# Supplementary material for: Three-dimensional cell culture models for metallodrug testing: induction of apoptosis and phenotypic reversion of breast cancer cells by thetrans-[Ru(PPh3)2(N,N-dimethyl-N-thiophenylthioureato-k2O,S)(bipy)]PF6complex
Source: Royal Society of Chemistry journal article supplement (doi:10.1039/d0qi00502a), 2020-01-01
Supplement: d0qi00502a2.pdf [file d0qi00502a2.pdf]

### Supplementary information

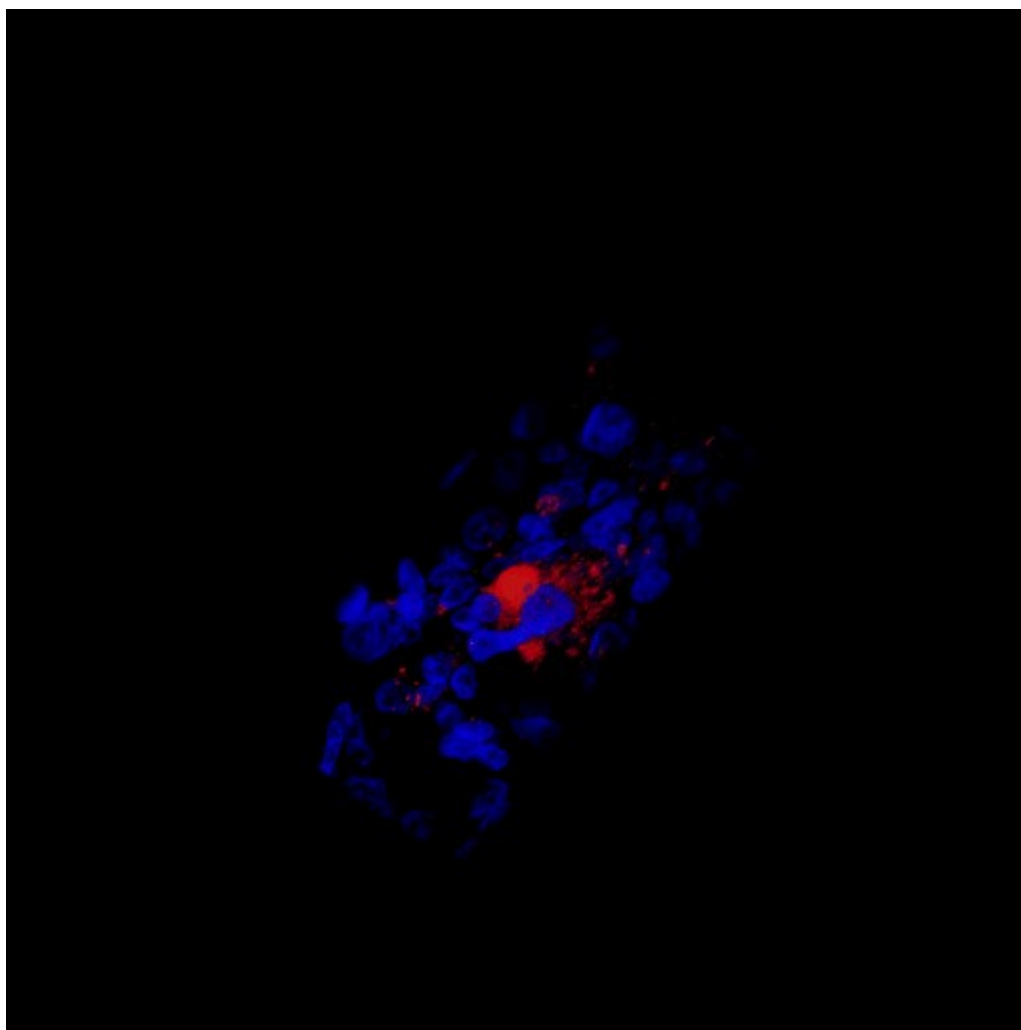

**Supplementary video 1. S1 cells cocultured with T4-2 tumors on laminin-coated hemichannels in the DOC.** Representative confocal video with nuclei stained with DAPI (blue) and T4-2 cells stained with Dil (red).
